# Supplementary material
Source: PubMed Central journal article supplement (PMC10101488)
Supplement: mmc1.pdf [file mmc1.pdf]

1 **SUPPLEMENTARY MATERIAL TO**

2

3 **Development of a compounded propofol nanoemulsion using multiple non-**  
4 **invasive process analytical technologies**

5

6 **Authors**

7 T. Rooimans <sup>a, b</sup>, M. Damen <sup>c</sup>, C.M.A. Markesteijn <sup>a</sup>, C.C.L. Schuurmans <sup>c</sup>, N.H.C. de  
8 Zoete <sup>a</sup>, P.M. van Hasselt <sup>d</sup>, W.E. Hennink <sup>b</sup>, C.F. van Nostrum <sup>b</sup>, M. Hermes <sup>c</sup>, R.  
9 Besseling <sup>c</sup>, H. Vromans <sup>a, b</sup>

10

11 <sup>a</sup> Research and Development Department, Tiofarma BV, Oud-Beijerland, the  
12 Netherlands

13 <sup>b</sup> Department of Pharmaceutics, Utrecht Institute for Pharmaceutical Sciences, Utrecht  
14 University, Utrecht, the Netherlands

15 <sup>c</sup> InProcess-LSP, Oss, the Netherlands

16 <sup>d</sup> Department of Pediatrics, Wilhelmina Children's Hospital, University Medical Center  
17 Utrecht, Utrecht, the Netherlands

18

19 **Corresponding author**

20 T. (Thijs) Rooimans

21 t.rooimans@uu.nl

22 3584 CG Utrecht

23 The Netherlands

24 **Supplementary material**

25 **Eq. 2** is derived as follows. One starts with an IVLE with a number  $N$  of lipid droplets  
26 of size  $d_0$ , giving a total lipid volume:

27 
$$V_{lip} = N \cdot \frac{\pi d_0^3}{6}$$

28 **Eq. S1**

29 When these droplets swell to a size  $d$  by absorption of a propofol volume  $V_p$ , volume  
30 conservation gives the following relation:

31 
$$V_{lip} + V_p = N \cdot \frac{\pi d_0^3}{6} + V_p = N \cdot \frac{\pi d^3}{6} \rightarrow 1 + \frac{6V_p}{\pi N d_0^3} = \left(\frac{d}{d_0}\right)^3$$

32 **Eq. S2**

33 The propofol volume is linked to the total volume  $V_{tot}$  by  $V_p = \phi_p \cdot V_{tot}$  with  $\phi_p$  the  
34 propofol volume fraction. Further we have:

35 
$$V_{tot} = V_{IVLE} + V_p = V_{IVLE} + \phi_p \cdot (V_{IVLE} + V_p) \simeq V_{IVLE}(1 + \phi_p)$$

36 **Eq. S3**

37

38  
39 Where a small term  $\phi_p V_p$  has been ignored. With these relations, and the definition for  
40 the initial lipid volume fraction  $\phi_0 = V_{lip}/V_{IVLE}$ , **Eq. S2** becomes:

41 
$$\frac{d}{d_0} = \sqrt[3]{1 + \frac{\phi_p V_{tot}}{V_{lip}}} \simeq \sqrt[3]{1 + \frac{\phi_p (1 + \phi_p)}{\phi_0}} \simeq 1 + \frac{\phi_p}{3 \cdot \phi_0}$$

42 **Eq. S4**

43 In the last step Taylor expansion has been used, which is valid for small values of  $\phi_p$ .

44 To show that this last step from the cubic root to the approximation holds, both

45 equations were simulated. The results are shown in the **Figure S8**. As can be seen  
46 from the figure, the approximation holds well in the range used in this study.

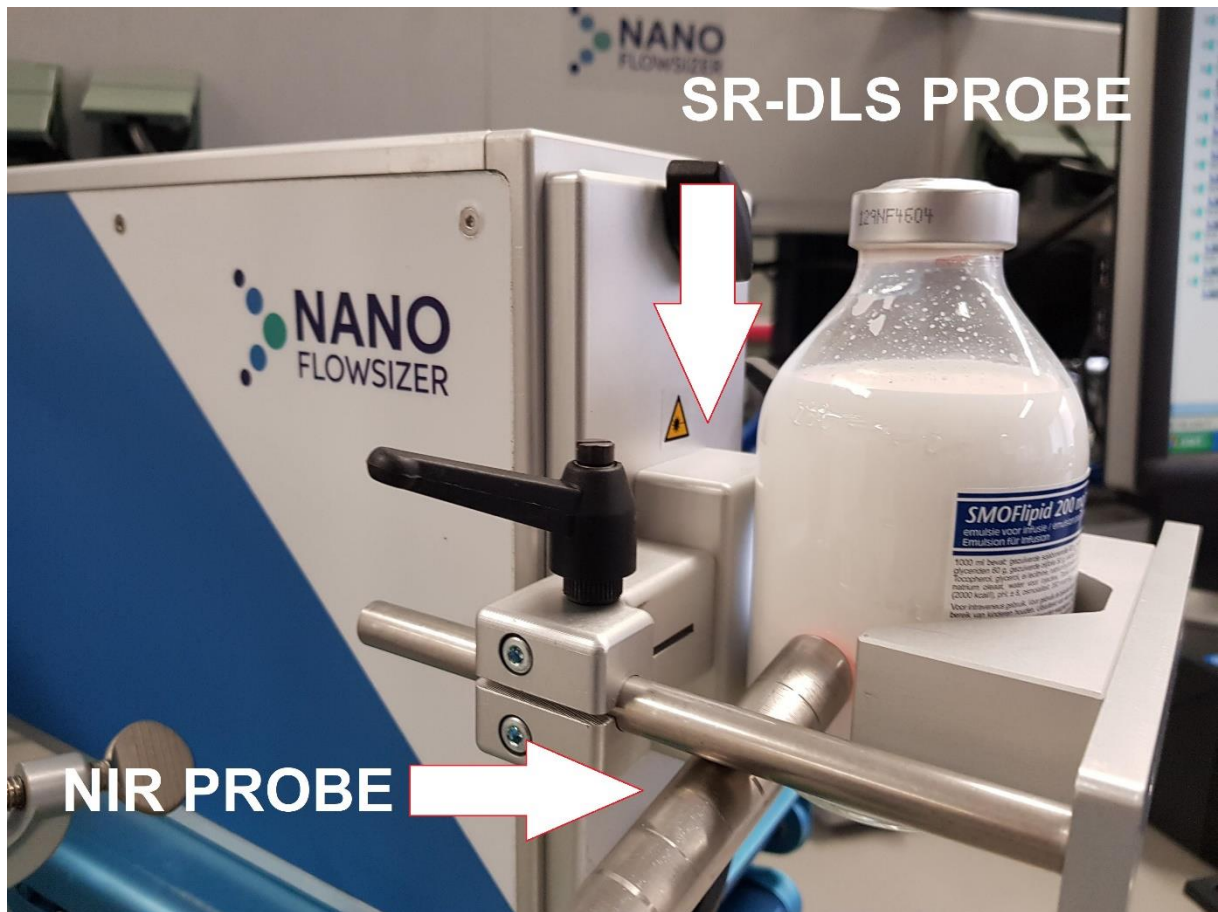

47

48 **Figure S1** Measurement configuration for simultaneous non-invasive DR-NIRS and

49 SR-DLS measurements.

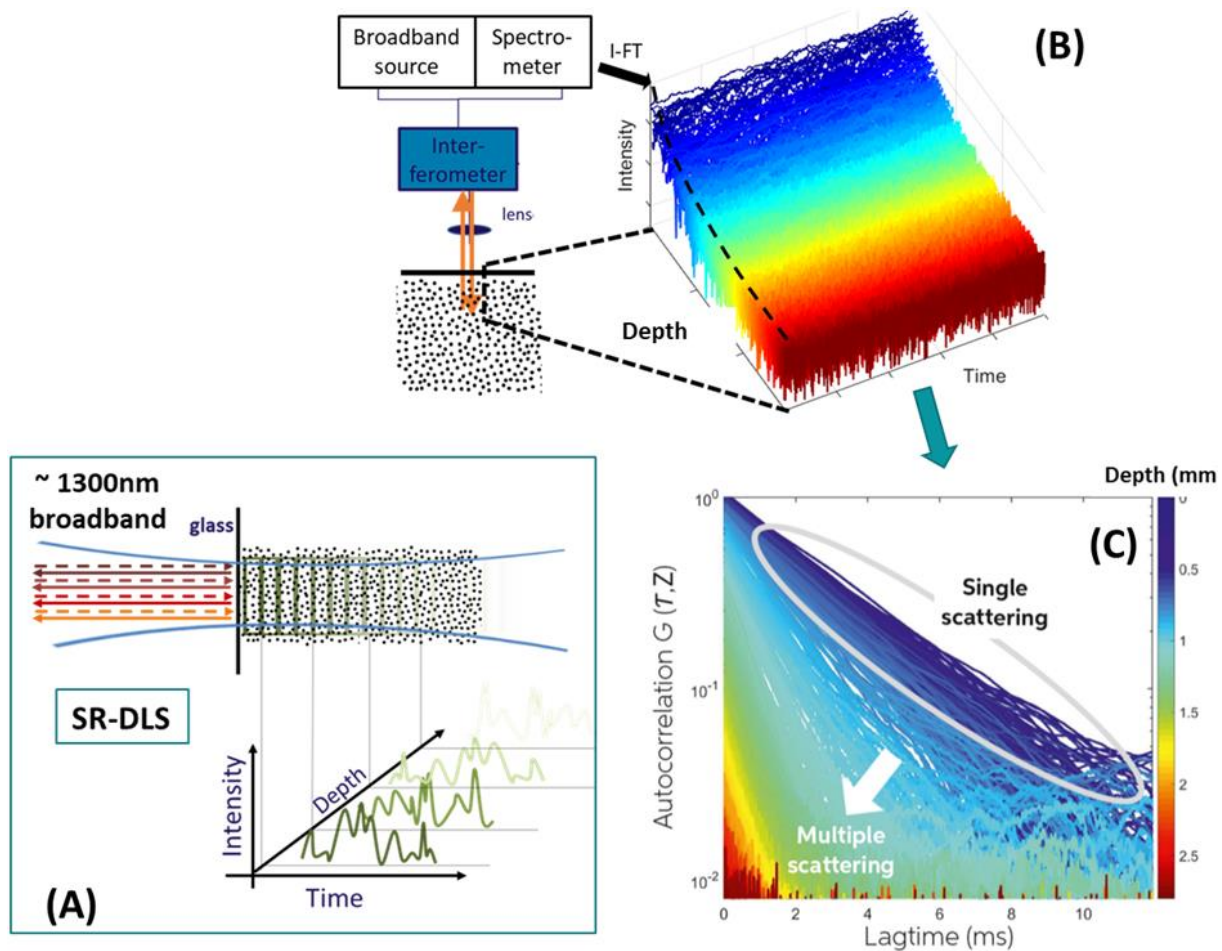

50

51 **Figure S2** A) Basic sketch of SR-DLS. B) Spatial Resolution via Fourier  
 52 Transformation of broadband interferograms. C) Depth resolved Correlation functions  
 53 allow spatial filtering of multiple scattered light.

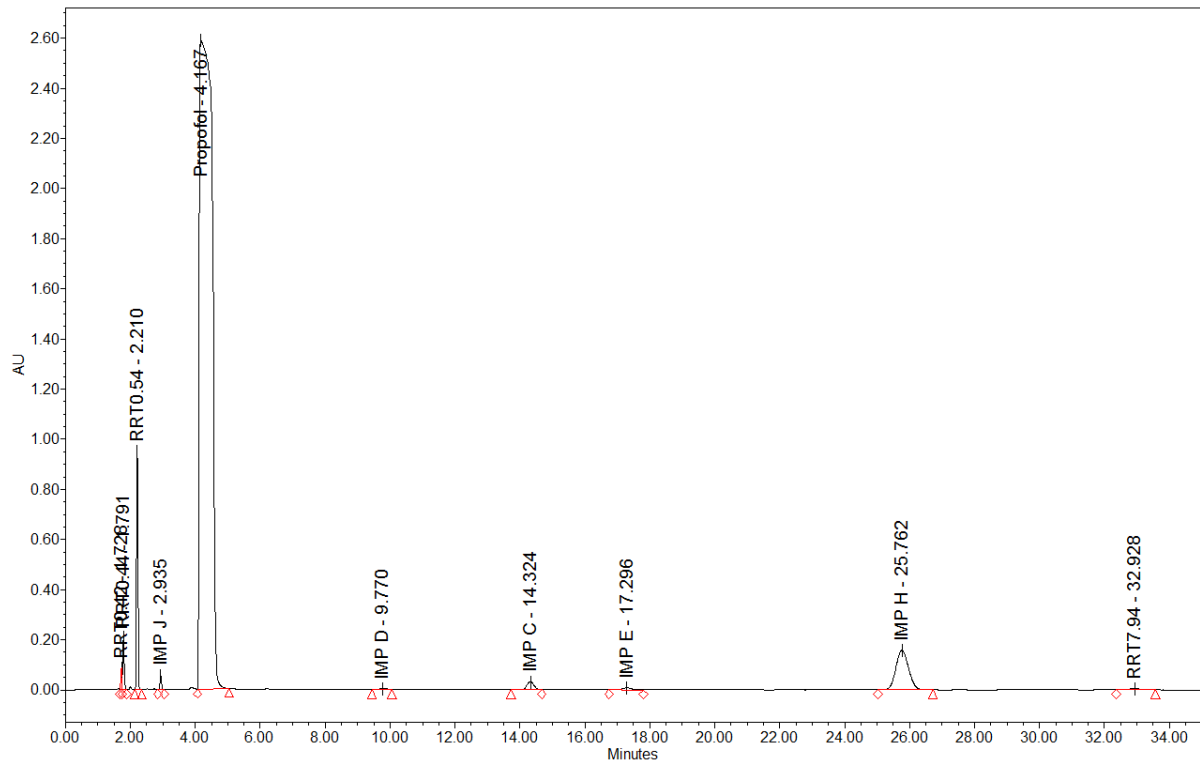

54

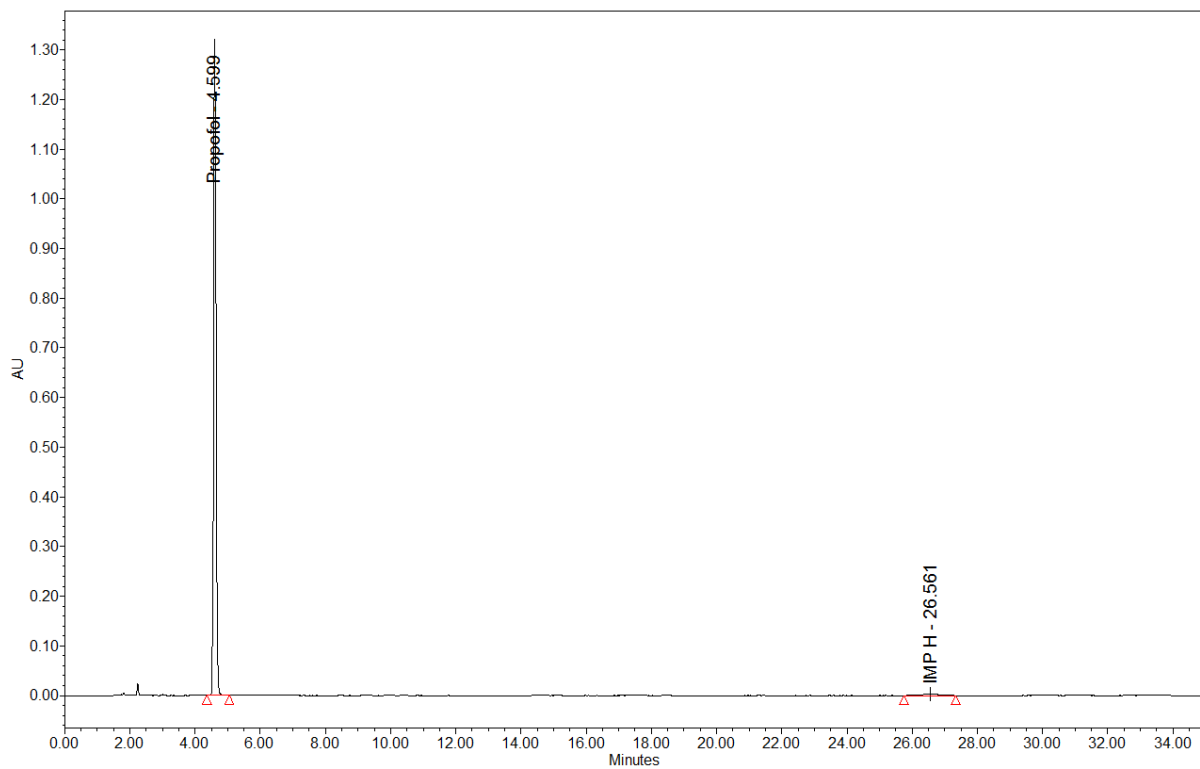

55

56 **Figure S3** Typical HPLC chromatograms of the propofol drug substance obtained with  
 57 the normal phase method for related substances (**upper panel**) and assay (**lower**  
 58 **panel**). When known, specified impurities have been labelled, otherwise the relative  
 59 retention time (RRT) is given.

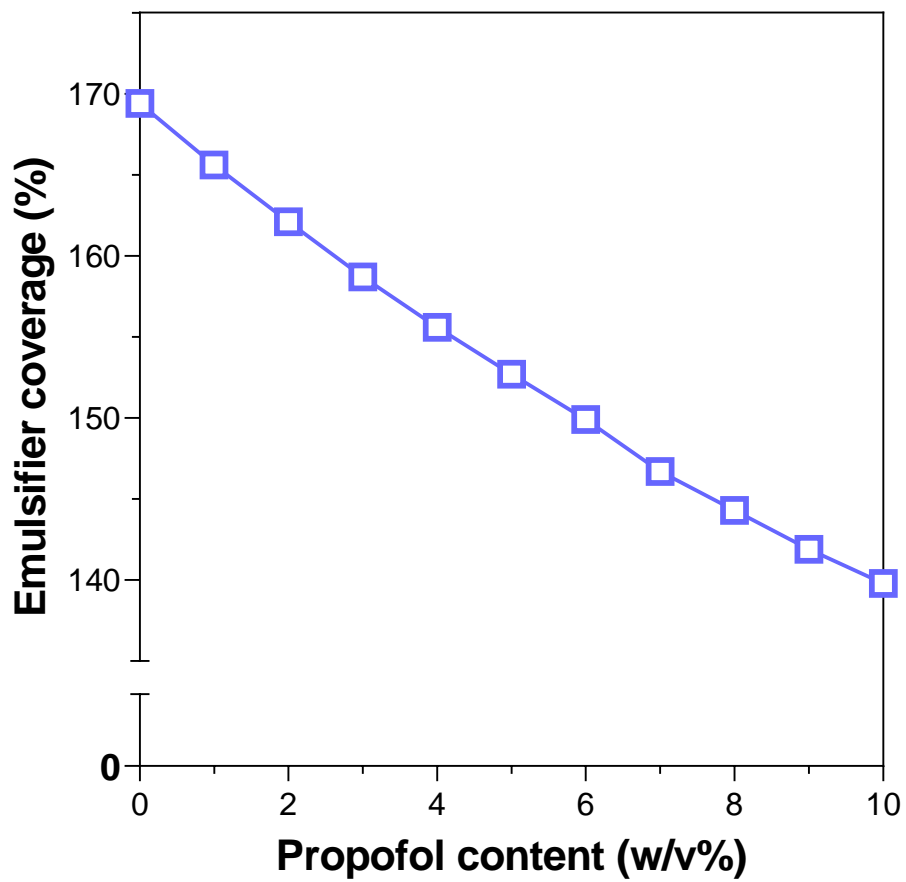

60

61 **Figure S4** Theoretical lipid droplet total specific surface area covered by  
62 phosphatidylcholine.

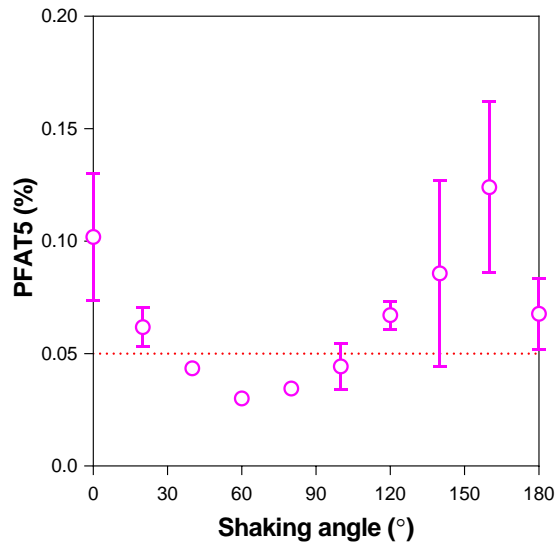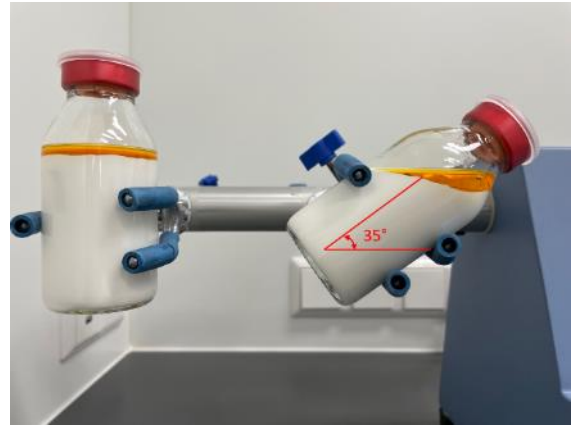

63 **Figure S5** Effect of shaking angle ( $^{\circ}$ ) on the PFAT5 after 5 minutes for a 6% w/v  
 64 remotely loaded propofol emulsion in IVLE. Symbols depict the mean and standard  
 65 deviation ( $n=3$ ), if no error bars are shown the value is smaller than the symbol value.



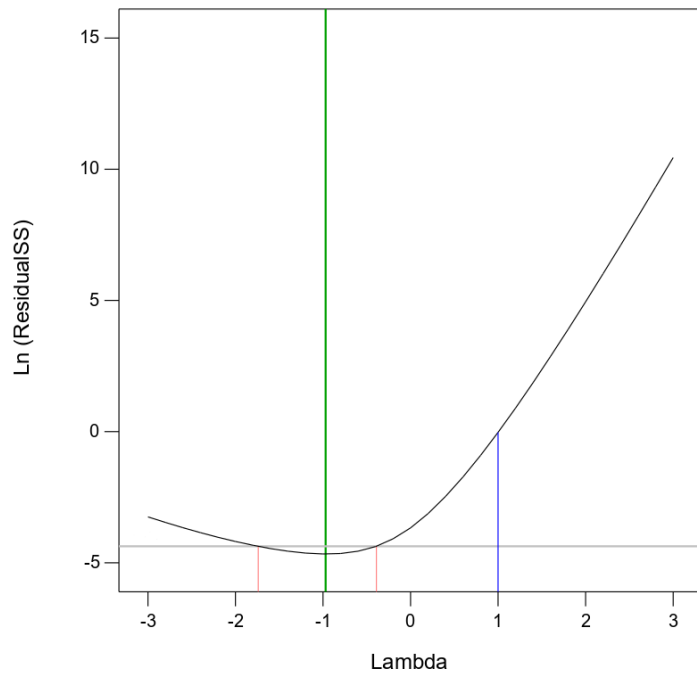

66

67 **Figure S6** Box-Cox plot for transformations. The current power (no transformation) is  
68 indicated by the blue line ( $\lambda = 1$ ) The minimum model residual is indicated by the green  
69 line and the 95%-confidence interval with both red lines.

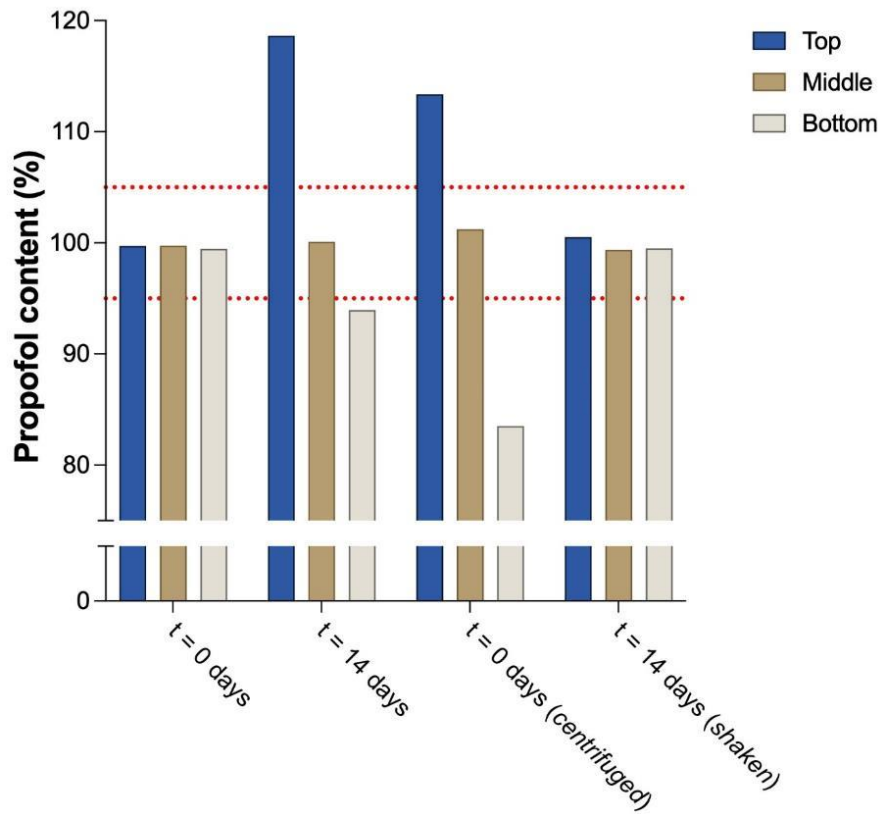

70

71 **Figure S7** Propofol concentrations determined by HPLC withdrawn from three position  
 72 within the glass container (top, middle and bottom). Centrifuged samples were  
 73 exposed to 1450 x g for 30 minutes at room temperature. Results are expressed as  
 74 the percentage of the theoretical concentration (4% w/v). Dashed lines at 105-95%  
 75 indicated upper and lower specification limits as per Ph Eur.

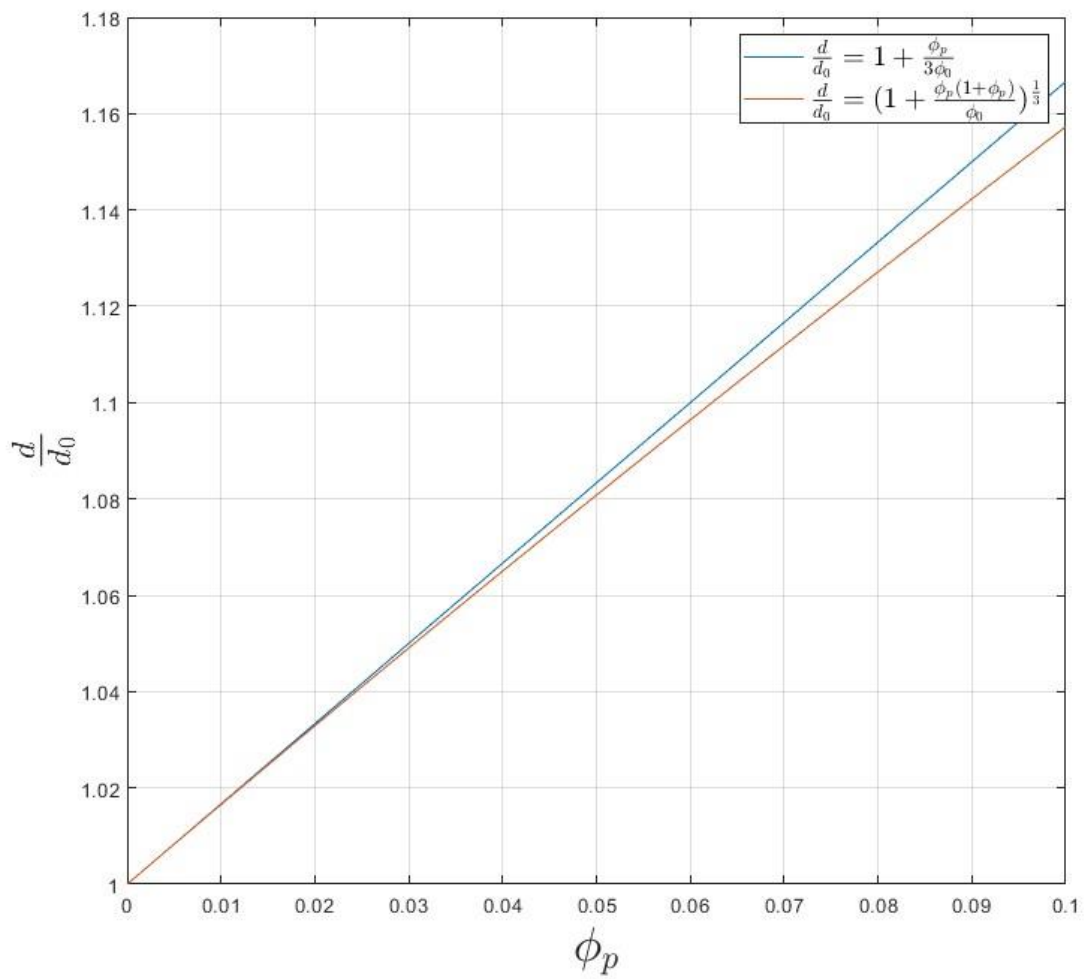

76

77 **Figure S8** Simulation of the initial and final approximations of  $d/d_0$  for  $\phi_p$  ranging from

78 0 to 0.1.

79 **Table S1** Overview of registered parenteral lipid emulsions in the Netherlands (anatomical therapeutic chemical code B05BA02).

| Name                | RVG   | MAH                | MA date (dd-mm-yyyy) | Presentation(s)                                                                   | Oil phase (per 100 ml)                            | Excipients                                                                                                                      | Generation      | Ref.       |
|---------------------|-------|--------------------|----------------------|-----------------------------------------------------------------------------------|---------------------------------------------------|---------------------------------------------------------------------------------------------------------------------------------|-----------------|------------|
| ClinOleic 20%       | 16863 | Baxter             | 13-10-1997           | Infusion bags (100, 250, 350, 500 and 1000 ml)                                    | 16 gram OO<br>4 gram SO                           | Phospholipids (egg), glycerol, sodium oleate, sodium hydroxide and purified water                                               | 3 <sup>rd</sup> | CBG, 2023a |
| Intralipid 20%      | 02608 | Fresenius Kabi     | 06-02-1974           | Infusion bags (100, 250, and 500 ml)                                              | 20 gram SO                                        | Phospholipids (egg), glycerol, sodium hydroxide and purified water                                                              | 2 <sup>nd</sup> | CBG, 2023b |
| Lipoplus 200 mg/ml  | 31376 | B. Braun Melsungen | 05-01-2006           | Glass bottles (100, 250, 500 and 1000 ml)                                         | 10 gram MCT<br>8 gram SO<br>2 gram FO             | Phospholipids (egg), glycerol, sodium oleate, ascorbyl palmitate, dl- $\alpha$ -tocopherol, sodium hydroxide and purified water | 3 <sup>rd</sup> | CBG, 2023c |
| Omegaven-Fresenius  | 23043 | Fresenius Kabi     | 20-04-1999           | Glass bottles (50 and 100 ml)                                                     | 10 gram FO                                        | Phospholipids (egg), glycerol, sodium oleate, dl- $\alpha$ -tocopherol, sodium hydroxide and purified water                     | 3 <sup>rd</sup> | CBG, 2023d |
| SMOFlipid 200 mg/ml | 30787 | Fresenius Kabi     | 17-01-2005           | Glass bottles (100, 250 and 500 ml) and infusion bags (100, 250, 500 and 1000 ml) | 6 gram SO<br>6 gram MCT<br>5 gram OO<br>3 gram FO | Phospholipids (egg), glycerol, sodium oleate, dl- $\alpha$ -tocopherol, sodium hydroxide and purified water                     | 3 <sup>rd</sup> | CBG, 2023e |

80 **Abbreviations:** Ref. = reference; RVG = register verpakte geneesmiddelen (national authorisation number); MA(H) = marketing

81 authorization (holder); OO = olive oil, SO = soybean oil; MCT = medium chain triglycerides and FO = fish oil.

82 **References to Table S1**

83 College ter Beoordeling van Geneesmiddelen (CBG), 2023a. Samenvatting van de  
84 productkenmerken. ClinOleic 20 %, emulsie voor infusie. [WWW Document].  
85 URL [https://www.geneesmiddeleninformatiebank.nl/smpc/h16863\\_smpc.pdf](https://www.geneesmiddeleninformatiebank.nl/smpc/h16863_smpc.pdf).  
86 (last accessed 25 February 2023).

87 College ter Beoordeling van Geneesmiddelen (CBG), 2023b. Samenvatting van de  
88 productkenmerken. Intralipid 20% emulsie voor infusie. [WWW Document]. URL  
89 [https://www.geneesmiddeleninformatiebank.nl/smpc/h02608\\_smpc.pdf](https://www.geneesmiddeleninformatiebank.nl/smpc/h02608_smpc.pdf). (last  
90 accessed 25 February 2023).

91 College ter Beoordeling van Geneesmiddelen (CBG), 2023c. Samenvatting van de  
92 productkenmerken. Lipoplus 200 mg/ml, emulsie voor infusie. [WWW Document].  
93 URL [https://www.geneesmiddeleninformatiebank.nl/smpc/h31376\\_smpc.pdf](https://www.geneesmiddeleninformatiebank.nl/smpc/h31376_smpc.pdf).  
94 (last accessed 25 February 2023).

95 College ter Beoordeling van Geneesmiddelen (CBG), 2023d. Samenvatting van de  
96 productkenmerken. Omegaven-Fresenius, emulsie voor infusie. [WWW  
97 Document]. URL [https://www.geneesmiddeleninformatiebank.nl/smpc/h23043  
98 \\_smpc.pdf](https://www.geneesmiddeleninformatiebank.nl/smpc/h23043_smpc.pdf). (last accessed 25 February 2023).

99 College ter Beoordeling van Geneesmiddelen (CBG), 2023e. Samenvatting van de  
100 productkenmerken. SMOf lipid 200 mg/ml, emulsie voor infusie. [WWW  
101 Document]. URL [https://www.geneesmiddeleninformatiebank.nl/smpc/h30787  
102 \\_smpc.pdf](https://www.geneesmiddeleninformatiebank.nl/smpc/h30787_smpc.pdf). (last accessed 25 February 2023).

103 **Table S2** Design table in actual units of each variable including the experimental  
 104 results for the volume-weighted percentage of large-diameter droplets (PFAT5).

| Run no. | Space type* | Concentration (% w/v) | Angle (°) | Time (min.) | PFAT5 (%) |
|---------|-------------|-----------------------|-----------|-------------|-----------|
| 1       | Axial       | 9.36                  | 60        | 10          | 0.070     |
| 2       | Axial       | 2.63                  | 60        | 10          | 0.036     |
| 3       | Axial       | 6                     | 23.36     | 10          | 0.058     |
| 4       | Factorial   | 8                     | 40        | 5           | 1.704     |
| 5       | Factorial   | 8                     | 80        | 5           | 0.102     |
| 6       | Axial       | 6                     | 60        | 1.59        | 0.068     |
| 7       | Center      | 6                     | 60        | 10          | 0.052     |
| 8       | Center      | 6                     | 60        | 10          | 0.049     |
| 9       | Axial       | 6                     | 93.63     | 10          | 0.144     |
| 10      | Factorial   | 4                     | 40        | 5           | 0.061     |
| 11      | Factorial   | 4                     | 80        | 5           | 0.044     |
| 12      | Factorial   | 8                     | 80        | 15          | 0.131     |
| 13      | Factorial   | 8                     | 40        | 15          | 0.086     |
| 14      | Center      | 6                     | 60        | 10          | 0.044     |
| 15      | Factorial   | 4                     | 80        | 15          | 0.095     |
| 16      | Center      | 6                     | 60        | 10          | 0.053     |
| 17      | Center      | 6                     | 60        | 10          | 0.045     |
| 18      | Factorial   | 4                     | 40        | 15          | 0.030     |
| 19      | Center      | 6                     | 60        | 10          | 0.045     |
| 20      | Axial       | 6                     | 60        | 18.41       | 0.068     |

105 \* Space type indicates the geometric location of each run within the design space.

106 **Table S3** ANOVA table showing the statistical output of the final model used to  
 107 describe the evolution of the PFAT5 as a function of the A) propofol concentration, B)  
 108 shaking angle and C) time.

| <b>Source</b>    | <b>Sum of Squares</b> | <b>Df</b> | <b>Mean Square</b> | <b>F-value</b> | <b>p-value</b> |                 |
|------------------|-----------------------|-----------|--------------------|----------------|----------------|-----------------|
| <b>Model</b>     | 1057.64               | 8         | 132.20             | 19.88          | < 0.0001       | significant     |
| A-Concentration  | 96.40                 | 1         | 96.40              | 14.50          | 0.0026         |                 |
| B-Angle          | 60.43                 | 1         | 60.43              | 9.09           | 0.0118         |                 |
| C-Time           | 13.98                 | 1         | 13.98              | 2.10           | 0.1750         |                 |
| AB               | 60.58                 | 1         | 60.58              | 9.11           | 0.0117         |                 |
| BC               | 226.17                | 1         | 226.17             | 34.01          | 0.0001         |                 |
| B <sup>2</sup>   | 170.59                | 1         | 170.59             | 25.65          | 0.0004         |                 |
| C <sup>2</sup>   | 92.23                 | 1         | 92.23              | 13.87          | 0.0034         |                 |
| AB <sup>2</sup>  | 21.73                 | 1         | 21.73              | 3.27           | 0.0981         |                 |
| <b>Residual</b>  | 73.13                 | 11        | 6.65               |                |                |                 |
| Lack of Fit      | 61.17                 | 6         | 10.20              | 4.25           | 0.0668         | not significant |
| Pure Error       | 11.98                 | 5         | 2.40               |                |                |                 |
| <b>Cor Total</b> | 1130.80               | 19        |                    |                |                |                 |

109 **Abbreviations:** Df = degrees of freedom.
